# Supplementary material for: Microglia at Sites of Atrophy Restrict the Progression of Retinal Degeneration via Galectin-3 and Trem2 Interactions
Source: PubMed Central journal article supplement — bioRxiv. 2023 Jul 19:2023.07.19.549403. Preprint. [Version 1] doi: 10.1101/2023.07.19.549403 (PMC10370087; doi:10.1101/2023.07.19.549403), 2023-07-19
Supplement: NIHPP2023.07.19.549403v1-supplement-1.pdf [file NIHPP2023.07.19.549403v1-supplement-1.pdf]

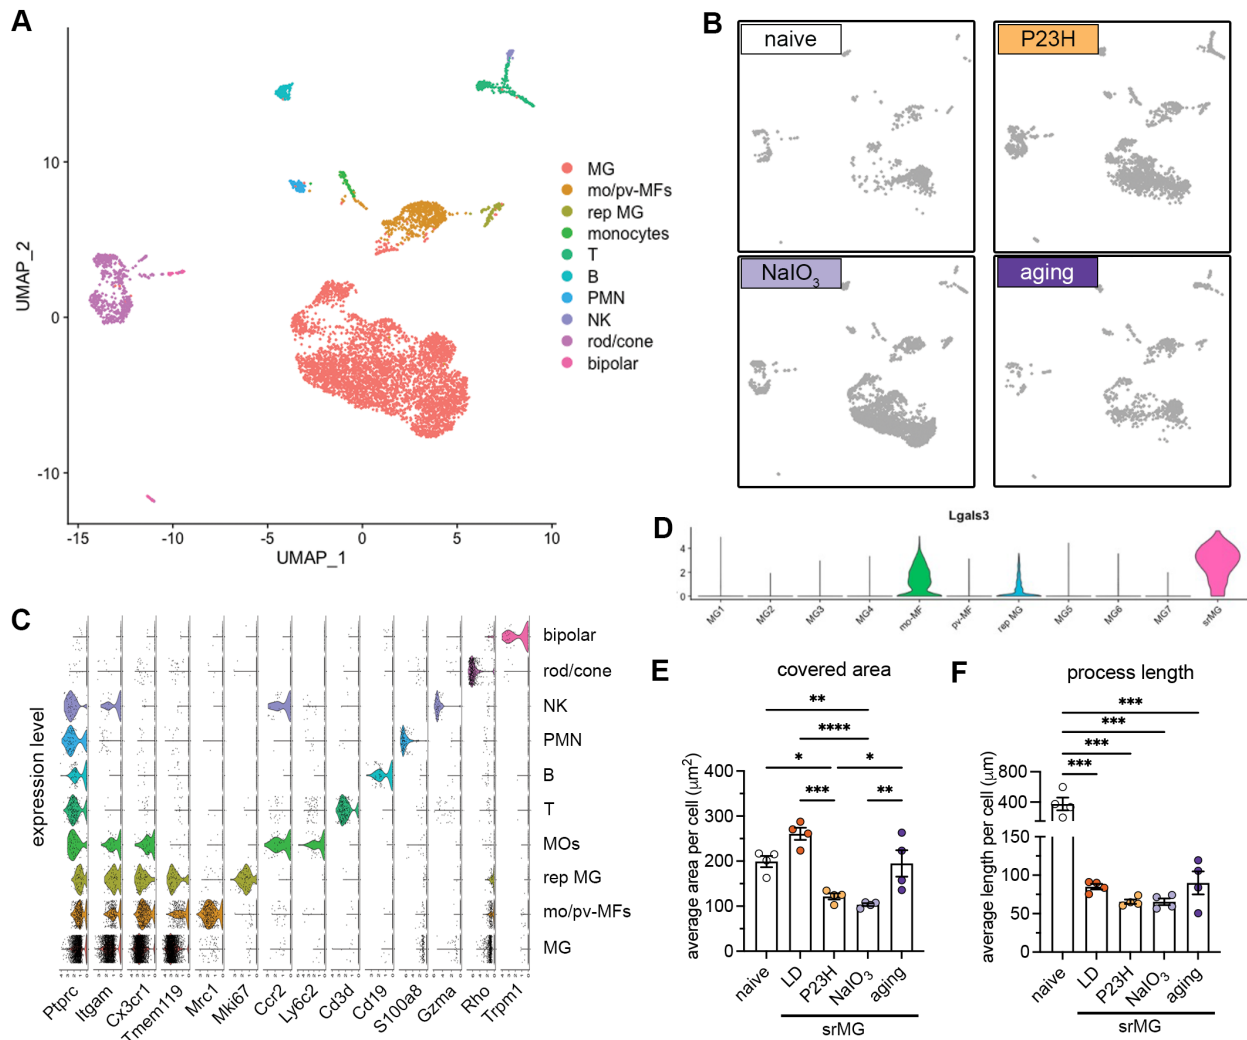

1  
 2 **Fig. S1. scRNA-seq and morphological analysis of subretinal microglia across mouse**  
 3 **models of outer retinal degeneration. (A and B), UMAP plots showing retinal CD45<sup>+</sup> cells**  
 4 **collected from naïve mice, NaIO<sub>3</sub> mediated RPE injury model, P23H model, and advanced aging**  
 5 **model as indicated. (C) Violin plots showing marker expression for each cluster. mo-MF,**  
 6 **monocyte-derived macrophages; pv-MF, perivascular macrophages; rep MG, replicating**  
 7 **microglia. (D) Violin plots showing *Lgals3* expression across all macrophage clusters. srMG,**  
 8 **subretinal microglia. (E and F) Quantifications of covered area and process length in naïve**  
 9 **microglia from the inner retina and subretinal microglia from four mouse models of retinal**  
 10 **degenerations (n=4 mice per group). \*: p<0.05; \*\*: p<0.01; \*\*\*: p<0.001 (one-way ANOVA**  
 11 **with Tukey's post hoc test)**

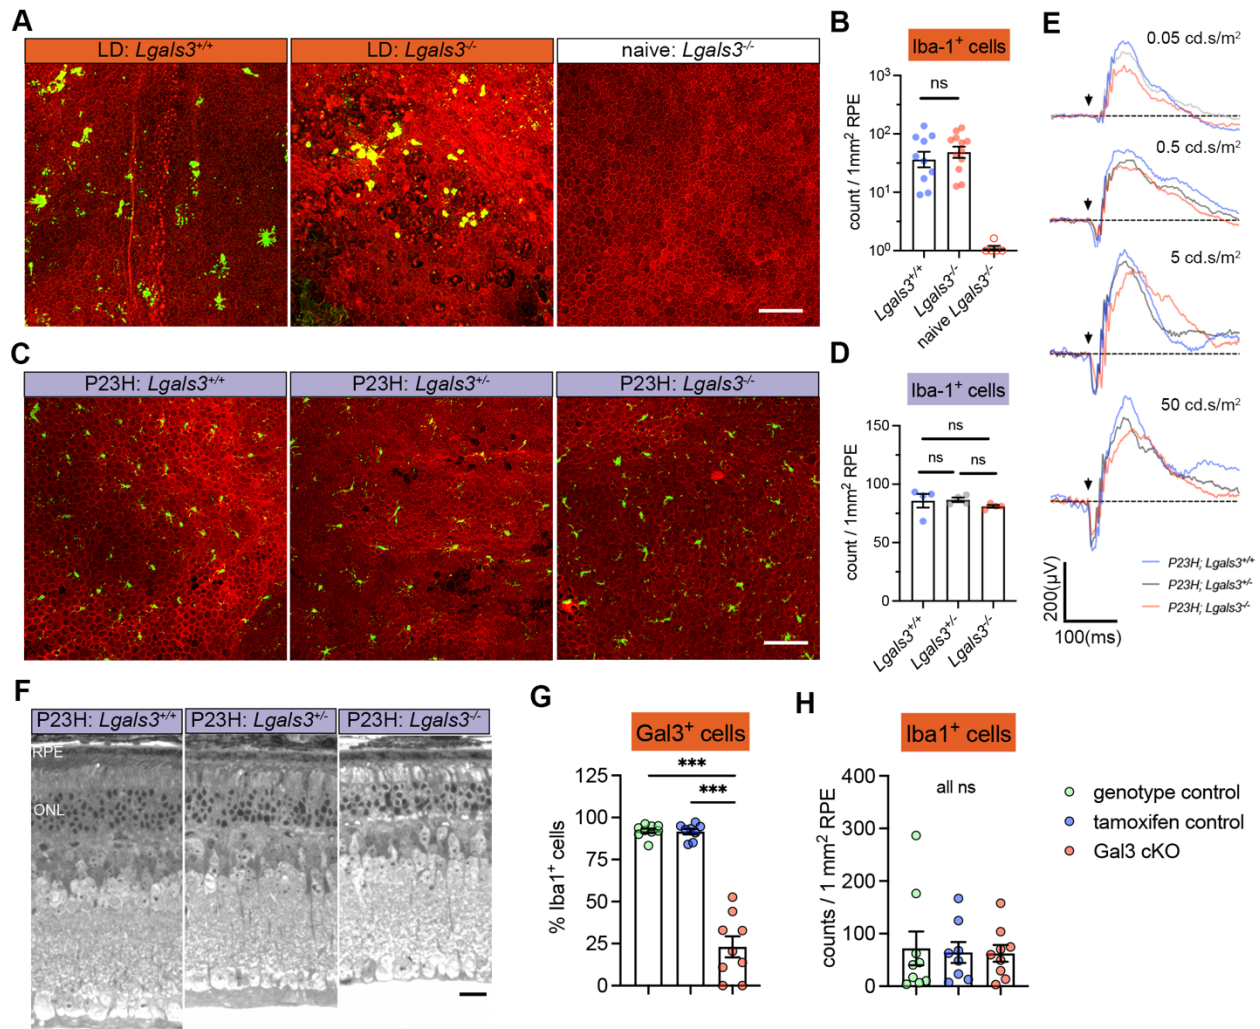

12  
 13 **Fig. S2. Contributions of Gal3 to disease-related retinal pathology and Iba1<sup>+</sup> cell**  
 14 **abundance in the subretinal space. (A)** Iba1 (green) and phalloidin (red) staining in RPE  
 15 flatmounts from LD-subjected mice as indicated. **(B)** Quantifications of subretinal Iba1<sup>+</sup> cells as  
 16 shown in A. **(C)** Iba1 (green) and phalloidin (red) staining in RPE flatmounts from P23H mice as  
 17 indicated. **(D)** Quantifications of subretinal Iba1<sup>+</sup> cells as shown in C. **(E)** Examples of ERG  
 18 responses at different flash intensities as indicated. **(F)** Representative retinal cross sections of  
 19 WT, *Lgal3*<sup>+/-</sup> and *Lgal3*<sup>-/-</sup> in P23H mice. **(G and H)** Quantifications of Gal3 depletion efficiency  
 20 (G) and frequencies of subretinal Iba1<sup>+</sup> cells (H) in Gal3 cKO mice (n=9) compared with  
 21 genotype control mice (n=9) and tamoxifen control (n=8). Scale bars: 100 μm. Data were  
 22 collected from 2-3 independent experiments. \*\*\*: p<0.001; ns: not significant (one-way  
 23 ANOVA with Tukey's post hoc test).

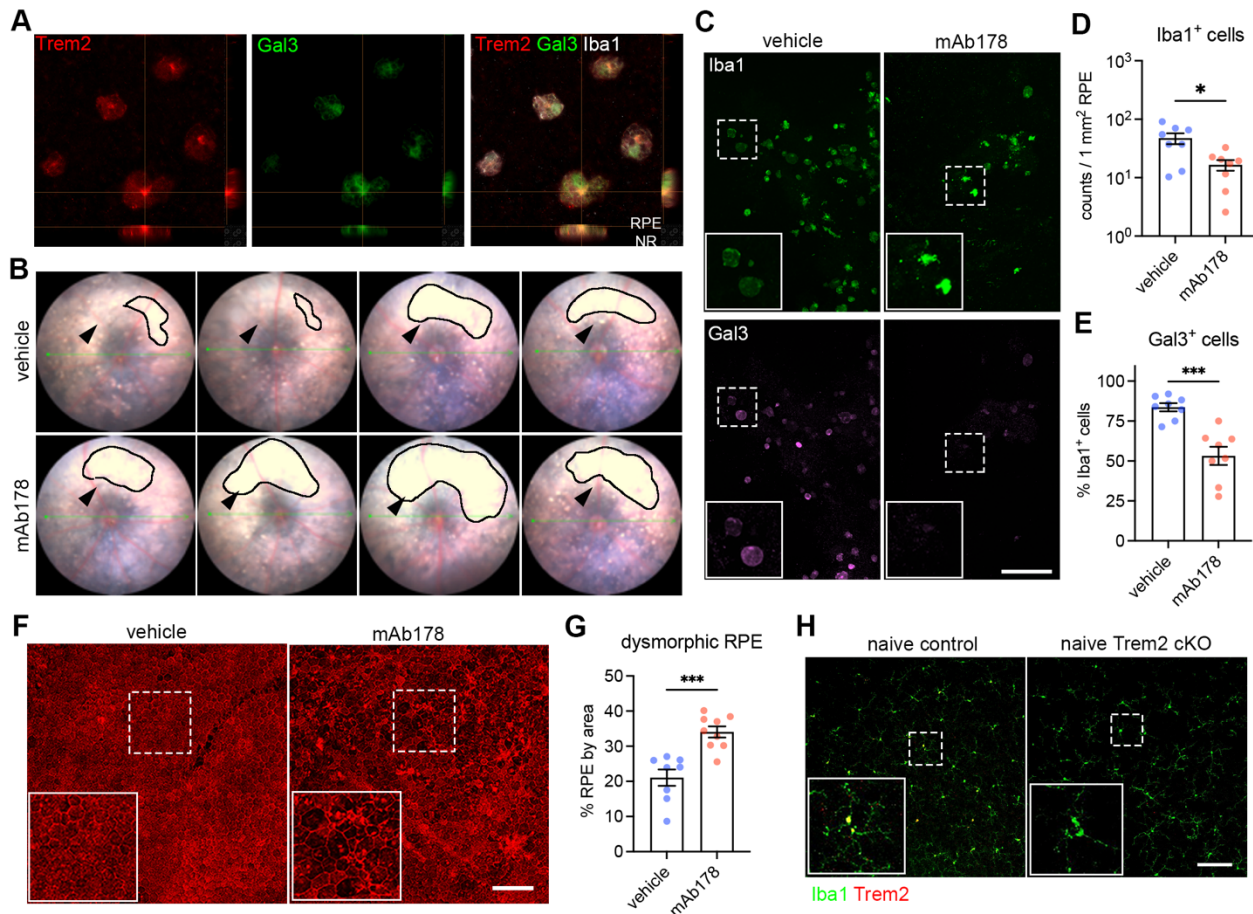

24

25 **Fig. S3. Regulation by Trem2 signaling in subretinal microglia.** (A) Split views of confocal  
 26 scans showing the colocalization of Trem2 (red) and Gal3 (green) in the subretinal microglia.  
 27 Lines indicate the RPE-facing and neuroretina (NR)-facing aspects as indicated. (B) Fundus  
 28 images showing increased subretinal white lesions in anti-Trem2 mAb178 treated mice in LD as  
 29 indicated by arrows. Images of 4 individual mice per group are shown. (C) Images of Iba1  
 30 (green) and Gal3 (magenta) staining in subretinal microglia between control and mAb178-treated  
 31 mice in LD. Scale bar: 100  $\mu$ m. (D and E) Quantifications of Iba1<sup>+</sup> cells and Gal3<sup>+</sup> cells between  
 32 control and mAb178 (n=8 per group). (F) Images of phalloidin staining in RPE flatmounts from  
 33 control and mAb178 treated mice in LD. Scale bar: 100 $\mu$ m. (G) Quantifications of dysmorphic  
 34 RPE cells between control (n=8) and mAb178 (n=9) treated mice. (H) Images of Iba1 (green)  
 35 and Trem2 (red) in microglia from the inner retina of naïve control and Trem2 cKO mice. Scale  
 36 bar: 50 $\mu$ m.

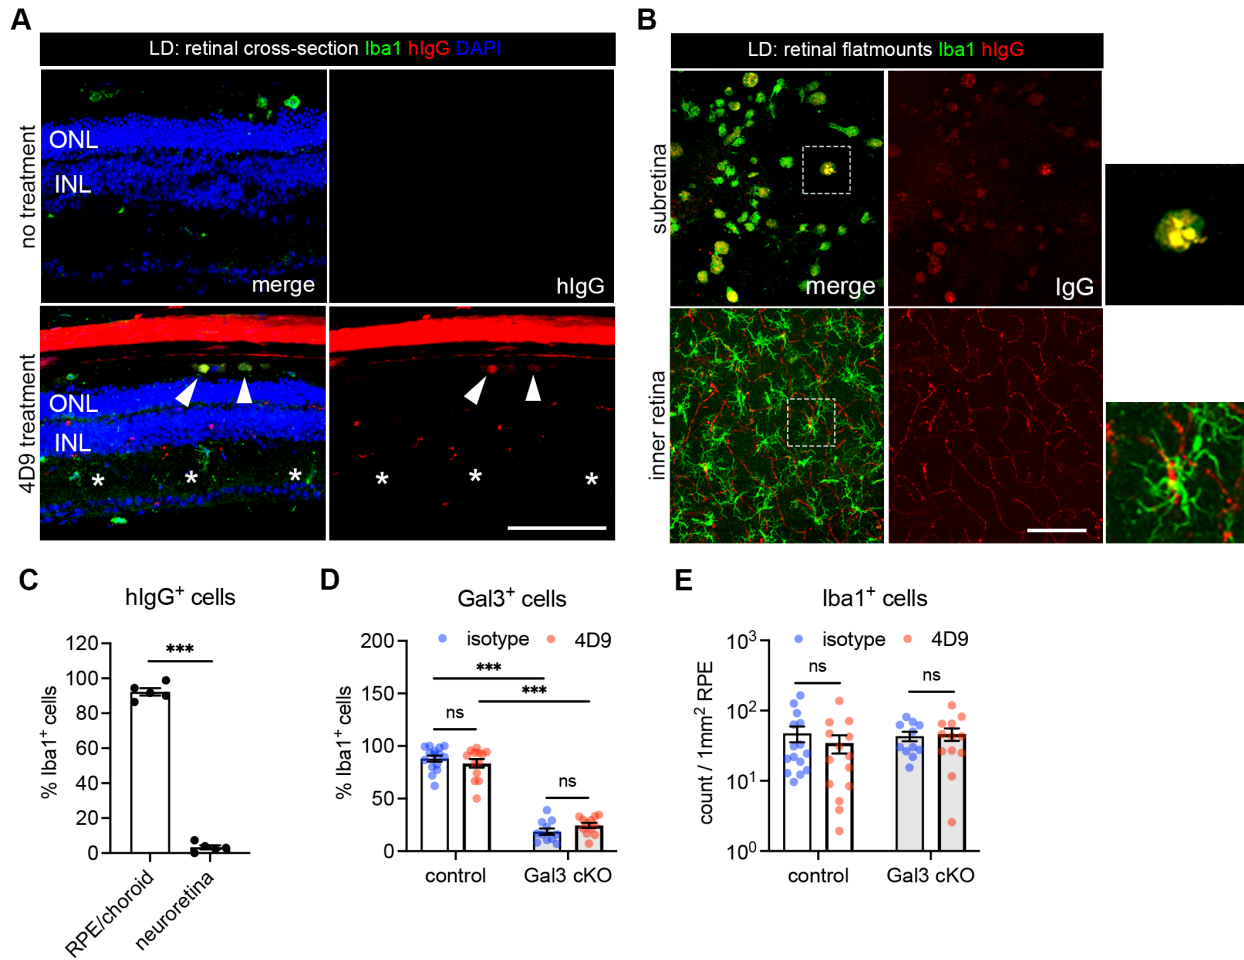

37

38 **Fig. S4. Subretinal microglia with 4D9 treatment.** (A) Staining of human IgG (red) and Iba1  
 39 (green) in retinal cross sections collected from mice with or without 4D9 treatment in LD. The  
 40 hlgG is used to trace 4D9 antibodies, which outlines retinal vasculatures in 4D9 treated mice.  
 41 Arrows indicate the presence of 4D9 antibodies in the subretinal microglia, while asterisks indicate  
 42 the absence of 4D9 antibodies in microglia from the inner retina. (B) Human IgG (red) and Iba1  
 43 (green) staining in RPE and neuroretina flatmounts collected from mice treated with 4D9  
 44 antibodies in LD. (C) Quantifications of hlgG<sup>+</sup> microglia in the subretinal space and neuroretina.  
 45 (D and E) Quantifications of Iba1<sup>+</sup> cells and Gal3<sup>+</sup> cells between control and Gal3 cKO mice  
 46 treated with either isotype or 4D9 (n=13 per group). Scale bars: 100 μm. Data were collected  
 47 from 2-4 independent experiments. \*\*\*: p<0.001; ns: not significant (unpaired Student's t-test:  
 48 C; two-way ANOVA with Tukey's post hoc test: D and E).

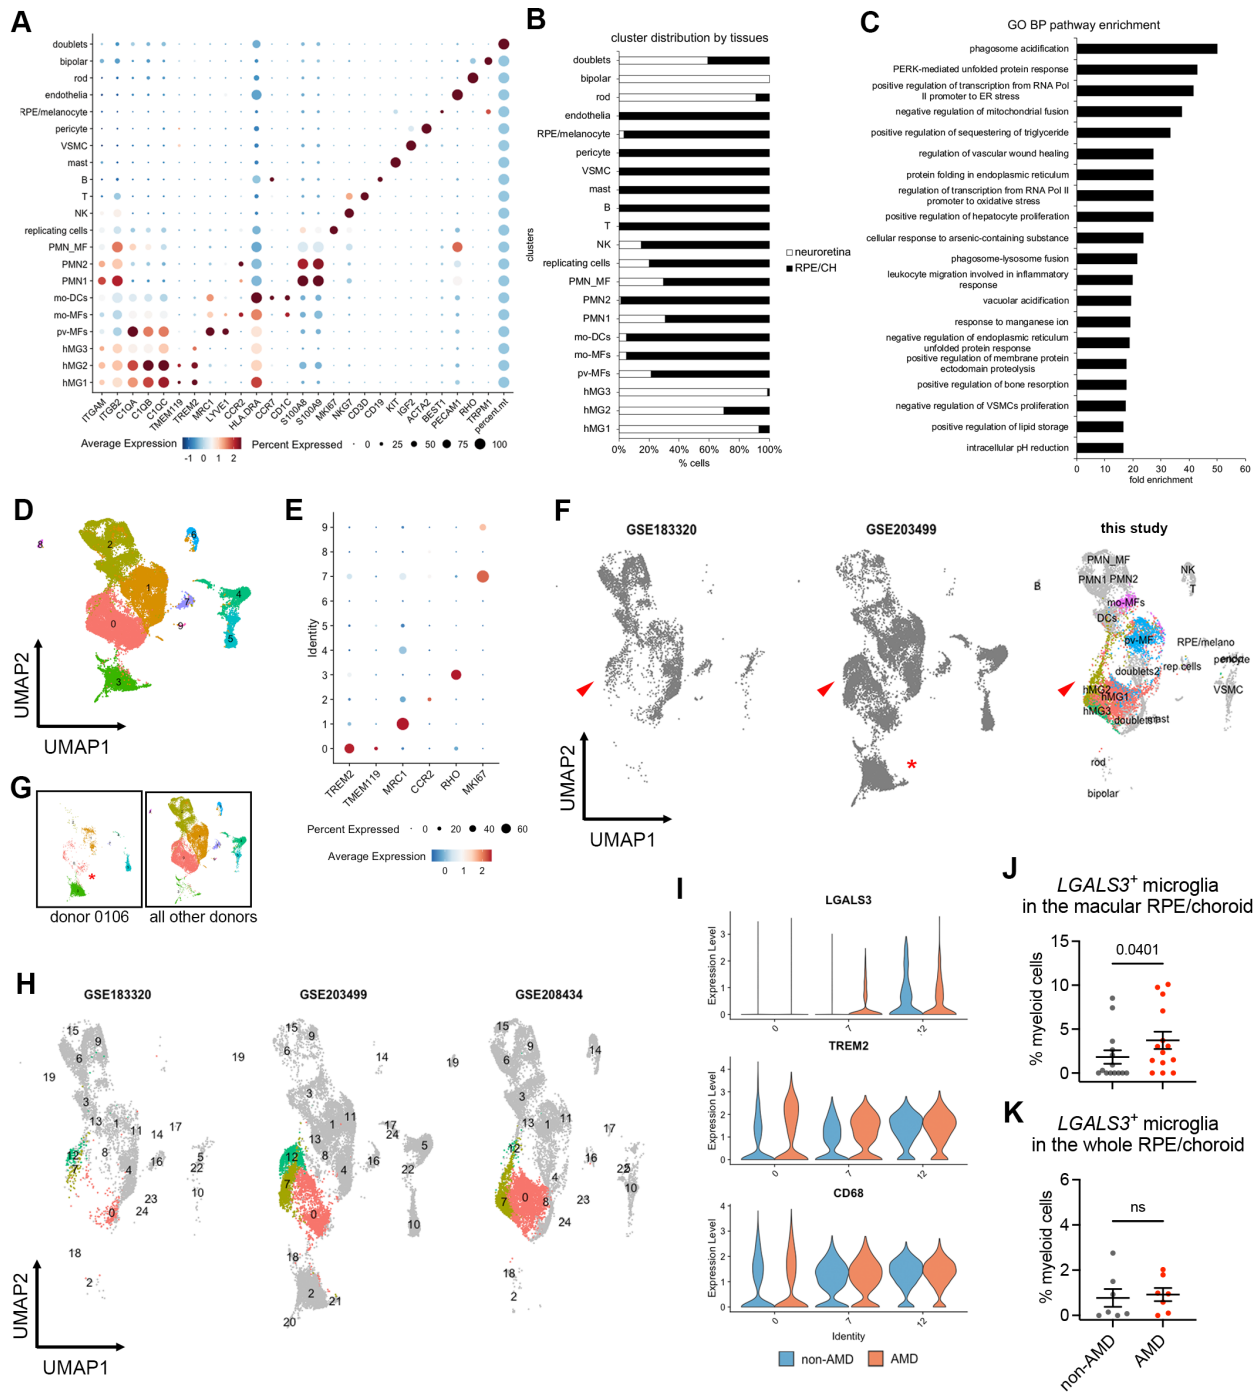

49

50 **Fig. S5. ScRNA-seq analysis of myeloid cells from human non-AMD and AMD donors. (A)**

51 Marker expression of all human clusters. hMG, human microglia; mo-MFs, monocyte-derived

52 macrophages; pv-MFs: perivascular macrophages; mo-DCs, monocyte-derived dendritic cells;

53 VSMC, vascular smooth muscle cells. (B) Distribution of clusters by neuroretina and

54 RPE/choroid tissues. Cell number of clusters was normalized to the total counts per tissue. (C)

55 Pathway enrichment analysis of subretinal microglia with top 200 shared up-regulated genes.

56 Top significant pathways sorted by false discovery and ranked by fold enrichment are shown.  
57 **(D)** UMAP plot showing integrated clustering analysis of three independent human AMD  
58 datasets. Data are shown with low resolution to reveal major cell types. **(E)** Dot plot showing the  
59 marker expression of major macrophage clusters. Cluster 3 is enriched with *RHO* expression. **(F)**  
60 UMAP plots showing the presence of hMG2 cluster in all three scRNA-seq datasets as indicated  
61 by arrows. **(G)** UMAP plots showing the enrichment of cluster 3 in donor 0106\_nAMD. **(H)**  
62 UMAP plots showing clustering analysis with high resolution by each dataset and comparable  
63 heterogeneity of microglia (cluster 0, 7 and 12). As dataset GSE183320 does not contain  
64 neurosensory retina tissues, few cells of major homeostatic microglia (cluster 0) are observed in  
65 this dataset. **(I)** Violin plots showing the expression of *LGALS3*, *TREM2* and *CD68* by microglial  
66 clusters between non-AMD and AMD donors. Both cluster 7 and 12 show *LGALS3* upregulation  
67 as hMG2 cluster identified in this study. **(J and K)** Quantifications of *LGALS3*<sup>+</sup> microglial  
68 clusters (7 and 12) in the macular and whole RPE/choroid tissues between non-AMD and AMD  
69 donors. Data were from three independent datasets and compared using Mann-Whitney test. P-  
70 values are shown. ns: not significant.

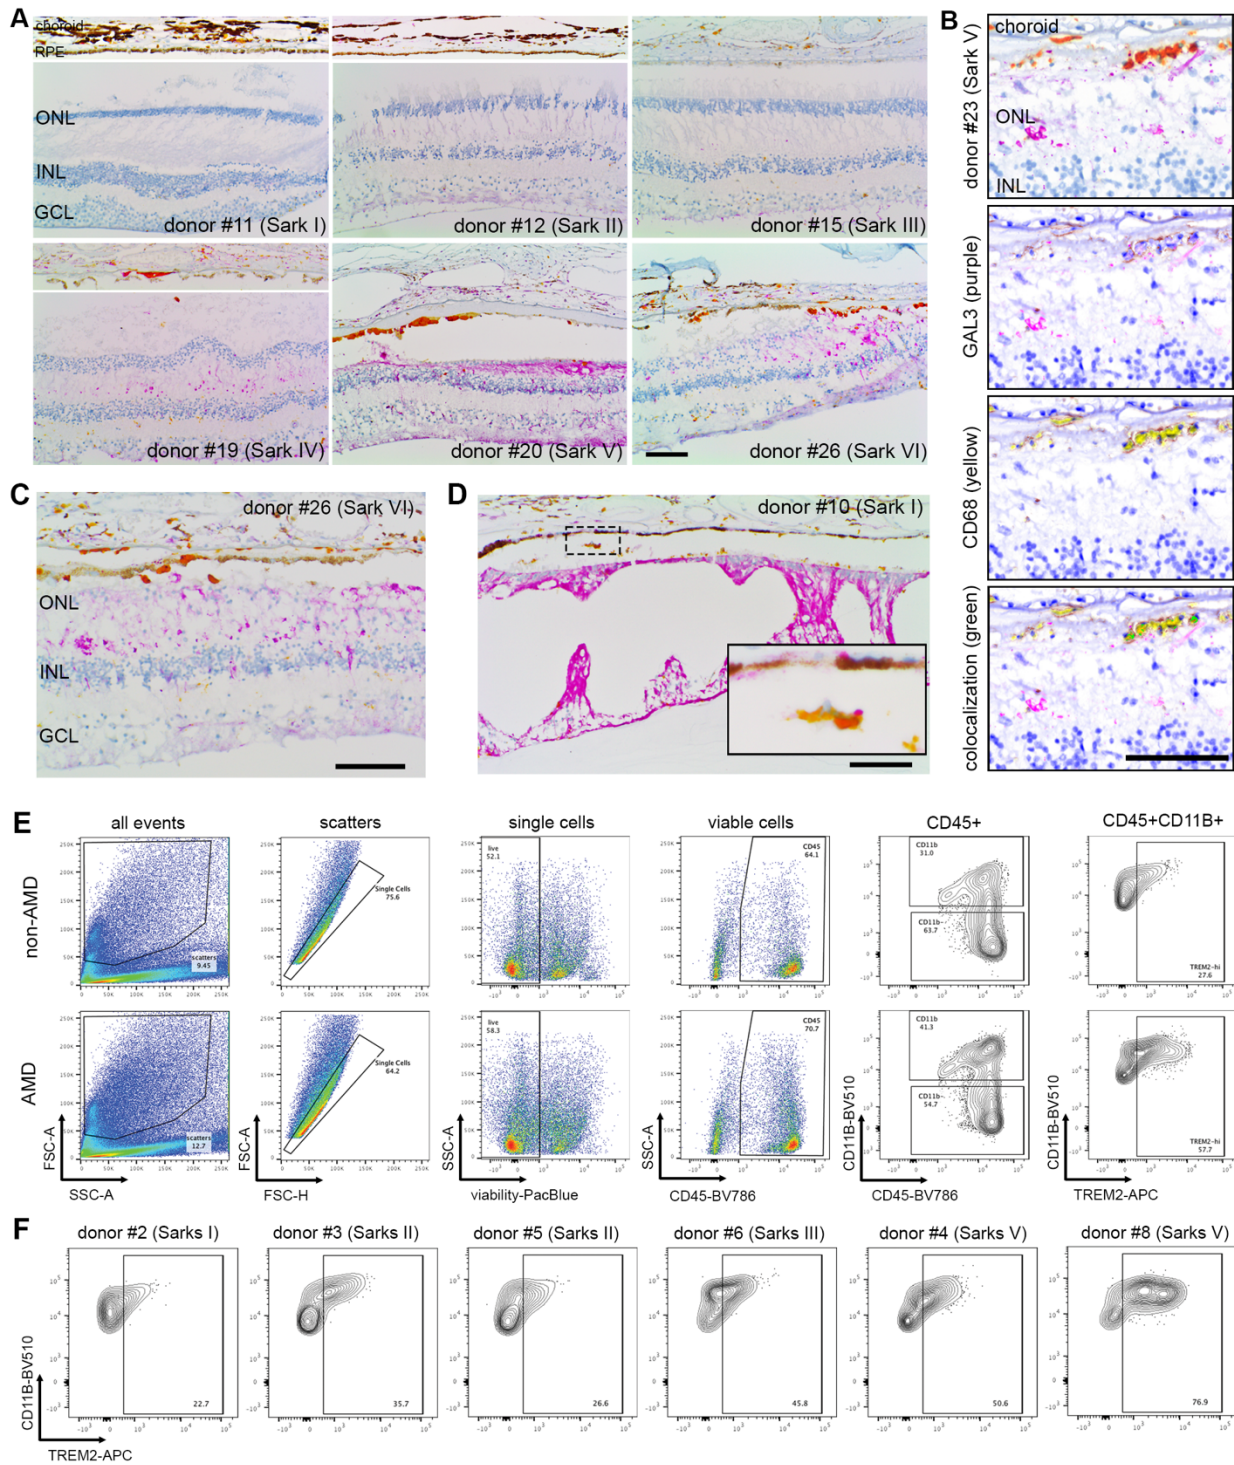

71

72 **Fig. S6. Validation of GAL3 and TREM2 expression by subretinal myeloid cells in human**  
 73 **AMD.** (A) Images of GAL3 (purple) and CD68 (yellow) co-staining in the macula region of  
 74 retinal sections from human donors categorized by Sark grades (I-VI). The macular neurosensory  
 75 retinas of some subject eyes exhibited fixation-related artifactual detachment. In these subjects,

76 separate images of RPE/choroid tissues are shown. Scale bar: 100 $\mu$ m. ONL and INL, outer and  
77 inner nuclear layers. GCL, ganglion cell layer. **(B)** Spectral imaging of GAL3 and CD68 co-  
78 staining in the geographic atrophy from donor #23 with advanced AMD (Sarks V). Unmixed  
79 purple spectrum (GAL3) and yellow spectrum (CD68) are shown. The areas of colocalized  
80 spectra are highlighted in green. Scale bar: 50 $\mu$ m. **(C and D)** Images showing the presence of  
81 subretinal GAL3 (purple) and CD68 (yellow) double positive cells in the areas with  
82 photoreceptor loss and preserved RPE in the transitional area of the macula from an AMD donor  
83 **(C)** and in the age-related peripheral degeneration of a non-AMD donor **(D)**. Scale bars: 100 $\mu$ m.  
84 **(E)** Gating strategy of flow cytometry analysis. CD45<sup>+</sup>CD11B<sup>+</sup> cells and CD45<sup>+</sup>CD11B<sup>-</sup> cells  
85 from control blood were used to determine the gating of TREM2<sup>+</sup> cells. Concatenated plots are  
86 shown for non-AMD and AMD. **(F)** Flow contour plots of individual donors showing increased  
87 percentage of TREM2<sup>+</sup> myeloid cells in AMD.
